CORRECTION

# Correction: Aggressive Chemotherapy and the Selection of Drug Resistant Pathogens

The *PLOS Pathogens* Staff

## Notice of Republication

This article was republished on October 19, 2015, to correct errors in equations that were introduced during the typesetting process. Specifically, the exponent in the fourth equation in the Material and Methods should be  $-8.821$ , not  $8.821$ , and this has been corrected. The publisher apologizes for the errors. Please download this article again to view the correct version. The originally published, uncorrected article and the republished, corrected article are provided here for reference.

## Supporting Information

**S1 File. Originally published, uncorrected article.**

(PDF)

**S2 File. Republished, corrected article.**

(PDF)

## Reference

1. Huijben S, Bell AS, Sim DG, Tomasello D, Mideo N, Day T, et al. (2013) Aggressive Chemotherapy and the Selection of Drug Resistant Pathogens. *PLoS Pathog* 9(9): e1003578. doi: [10.1371/journal.ppat.1003578](https://doi.org/10.1371/journal.ppat.1003578) PMID: [24068922](https://pubmed.ncbi.nlm.nih.gov/24068922/)

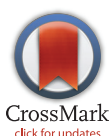

## OPEN ACCESS

**Citation:** The *PLOS Pathogens* Staff (2015) Correction: Aggressive Chemotherapy and the Selection of Drug Resistant Pathogens. *PLoS Pathog* 11(11): e1005301. doi:10.1371/journal.ppat.1005301

**Published:** November 17, 2015

**Copyright:** © 2015 The PLOS Pathogens Staff. This is an open access article distributed under the terms of the [Creative Commons Attribution License](https://creativecommons.org/licenses/by/4.0/), which permits unrestricted use, distribution, and reproduction in any medium, provided the original author and source are credited.
